# Supplementary material for: Assembly of neutral conjugated polymers with layered double hydroxide nanosheets by the layer-by-layer method
Source: Royal Society of Chemistry journal article supplement (doi:10.1039/c6ra17924j), 2016-01-01
Supplement: c6ra17924j1.pdf [file c6ra17924j1.pdf]

Supporting information for

Assembly of neutral conjugated polymers with layered double hydroxides  
nanosheets by the layer-by-layer method

Ping Zhang, Hailong Li, Jingjing Shi and Jun Lu\*

State Key Laboratory of Chemical Resource Engineering, Beijing University of Chemical  
Technology, Beijing 100029, PR China

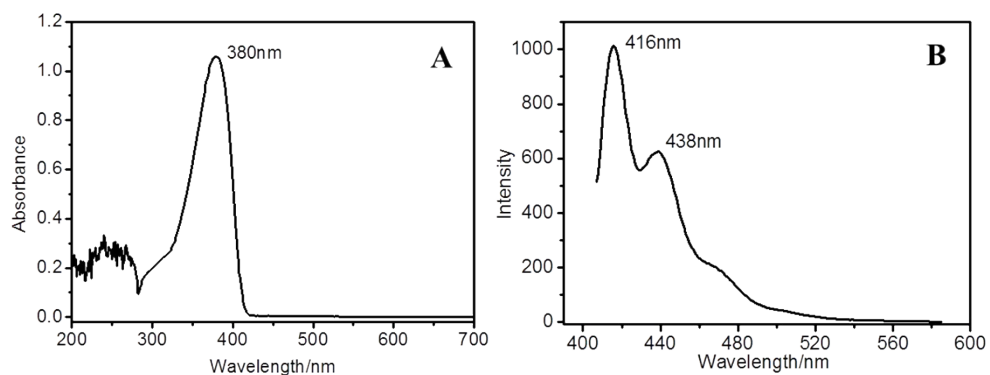

**Figure S1.** (A) UV-vis absorption spectra and (B) fluorescence emission spectra of the PFH-Ec solution.

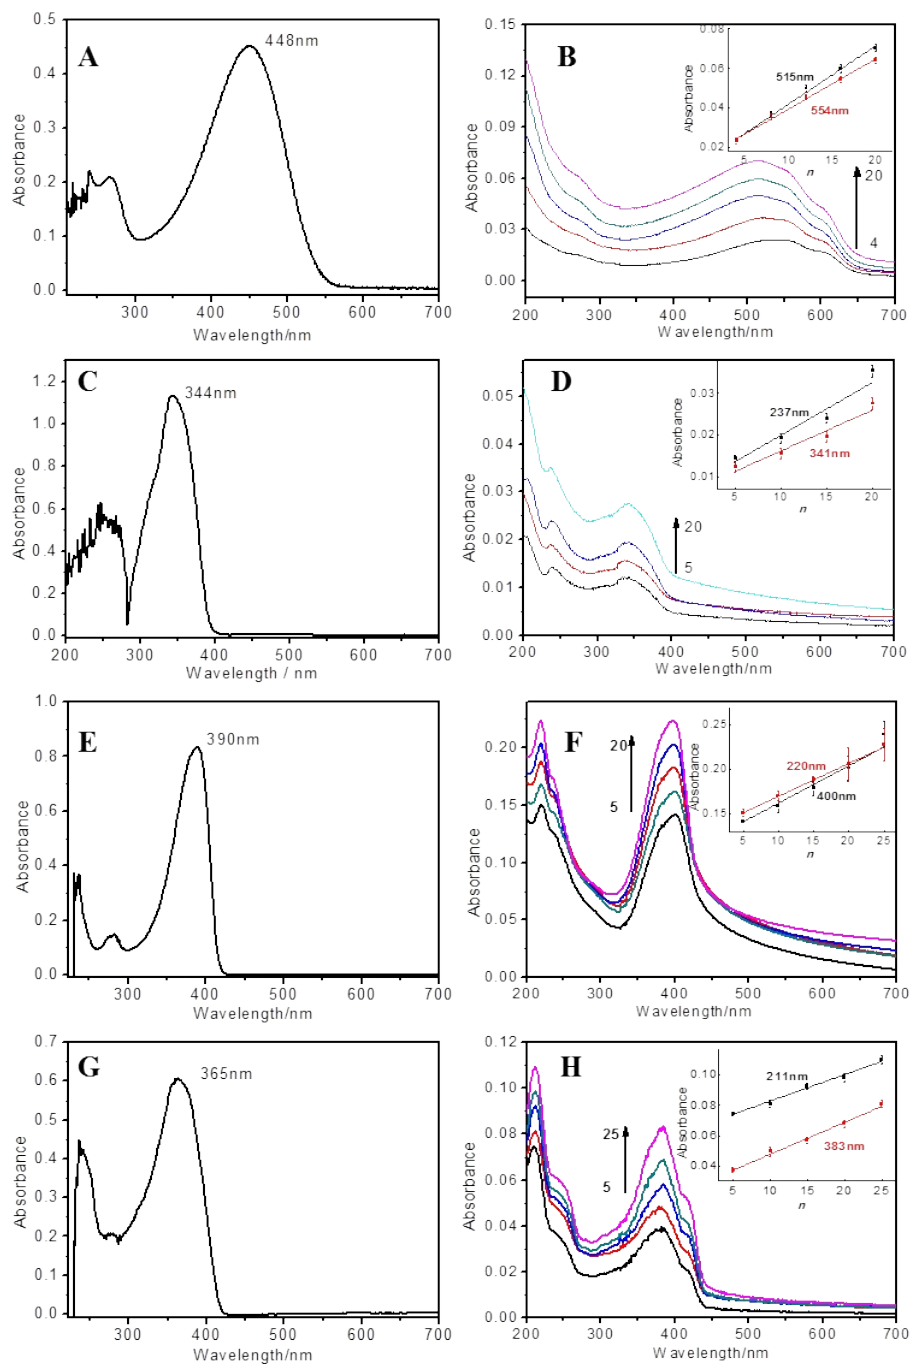

**Figure S2.** UV-Vis absorption spectra of (A) P3HT, (C) PFPC, (E) PHF, (G) PPE solution and (B)  $(\text{P3HT/LDH})_n$  ( $n = 4-20$ ), (D)  $(\text{PFPC/LDH})_n$  ( $n = 5-20$ ), (F)  $(\text{PHF/LDH})_n$  ( $n = 5-20$ ), (H)  $(\text{PPE/LDH})_n$  ( $n = 5-25$ ) UTFs. The insets show the absorbance versus  $n$ .

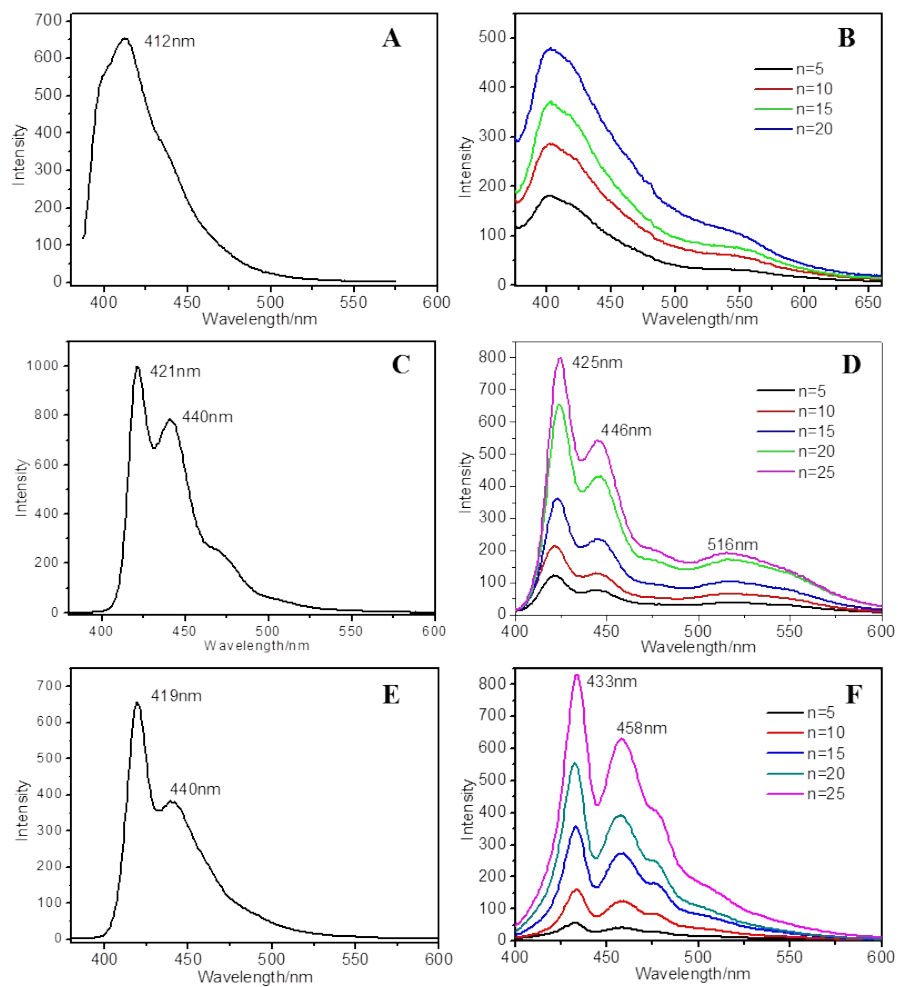

**Figure S3.** Fluorescence spectra of (A) PFPC, (C) PHF, (E) PPE solution, and (B)  $(\text{PFPC/LDH})_n$  ( $n = 5-20$ ), (D)  $(\text{PHF/LDH})_n$  ( $n = 5-25$ ), (F)  $(\text{PPE/LDH})_n$  ( $n = 5-25$ ) UTFs.

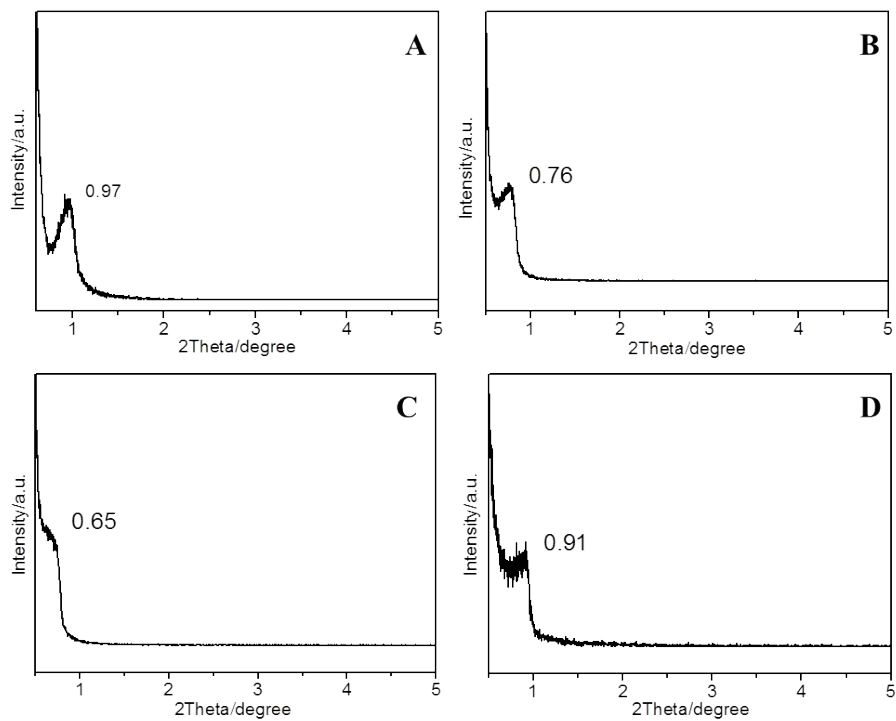

**Figure S4.** Small XRD patterns of (A) (P3HT/LDH)<sub>40</sub>, (B) (PFPC/LDH)<sub>40</sub>, (C) (PHF/LDH)<sub>40</sub>, (D) (PPE/LDH)<sub>40</sub> UTFs.

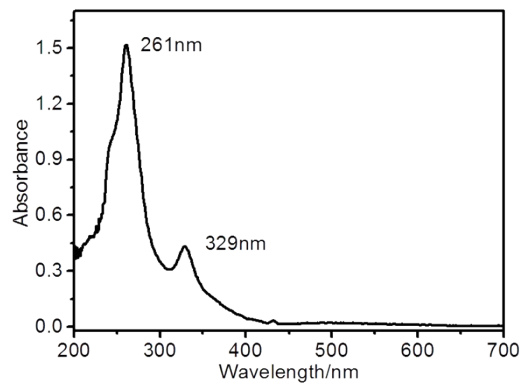

**Figure S5.** UV-vis absorption spectra of PCBM solution.

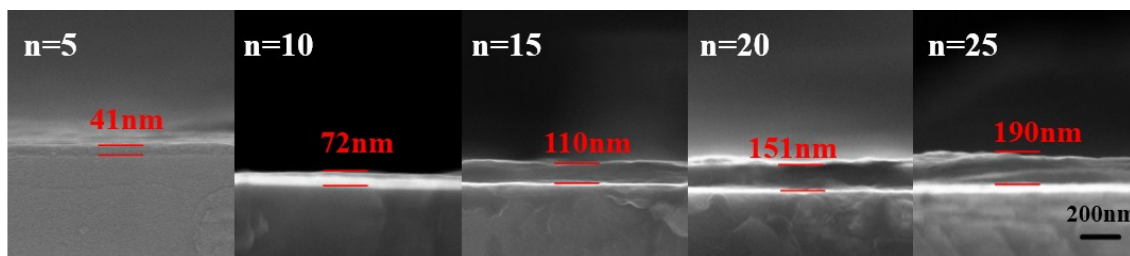

**Figure S6.** The SEM side view images of the  $(\text{PCBM@P3HT/LDH})_n$  ( $n = 5-25$ ) UTFs.

The scale is constant in all images.

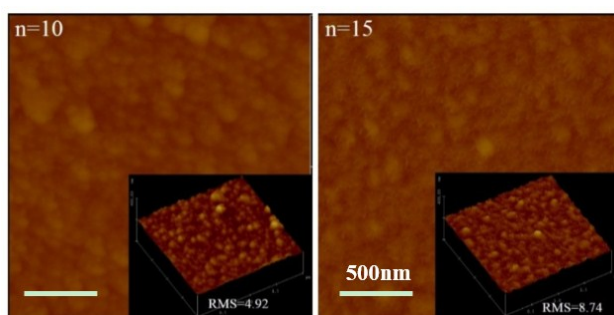

**Figure S7.** The AFM images of the  $(\text{PCBM@P3HT/LDH})_n$  ( $n = 10, 15$ ) UTFs (insert: 3D maps corresponds the 2D images), scanning area is random  $2\mu\text{m} \times 2\mu\text{m}$ .

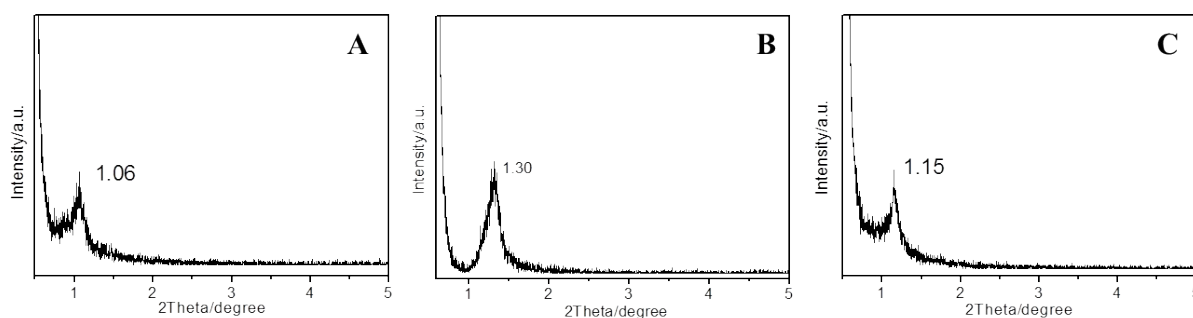

**Figure S8.** Small XRD patterns of the (A)  $(\text{PCBM@PFH-Ec/LDH})_{40}$ , (B)  $(\text{PCBM@PFPC/LDH})_{40}$  and (C)  $(\text{PCBM@P3HT/LDH})_{40}$  UTFs.

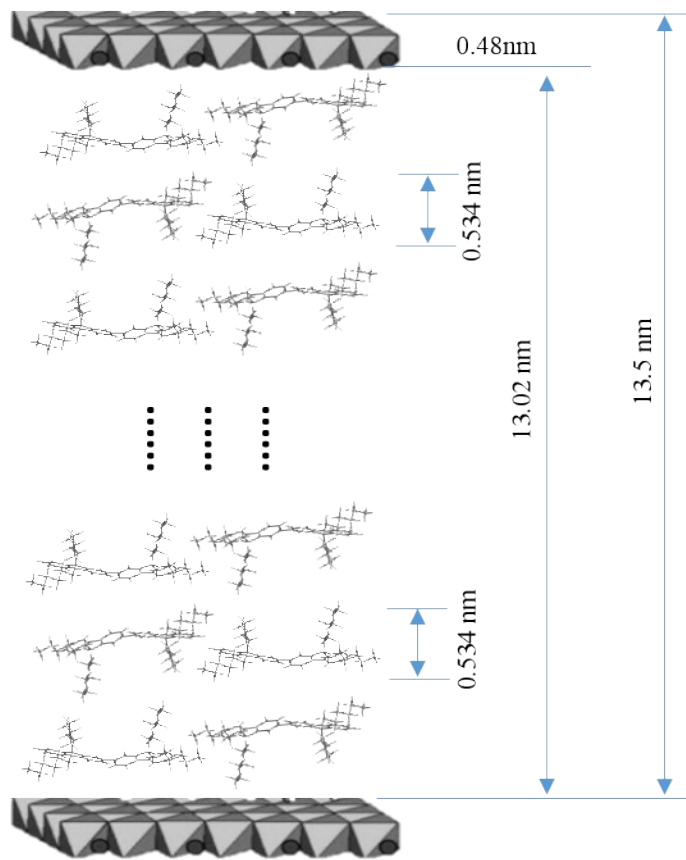

**Scheme S1.** The structure model of LDH/PHF/LDH UTF.

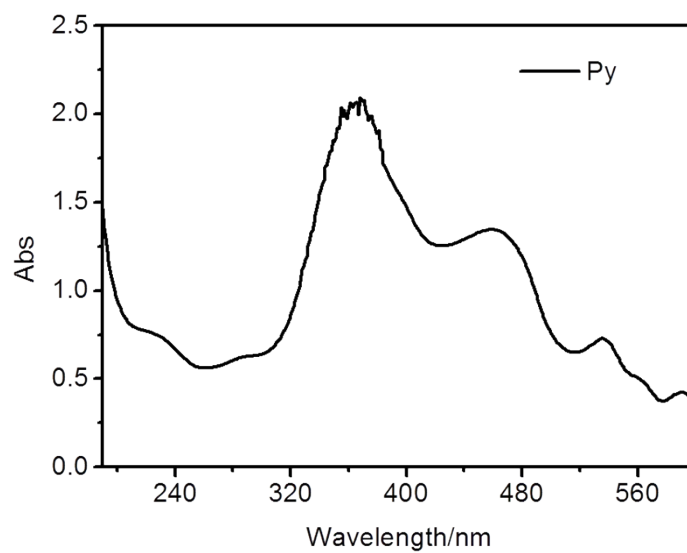

**Figure S9.** Absorption spectra of prophyrin solution (pH= 7).
